# Supplementary material
Source: Springer Nature journal article supplement (https://www.springermedizin.de/resource/supplementary/12943_2010_1504_MOESM3_ESM.pdf/9554800)
Supplement: MOESM3 [file 9554800]

# A

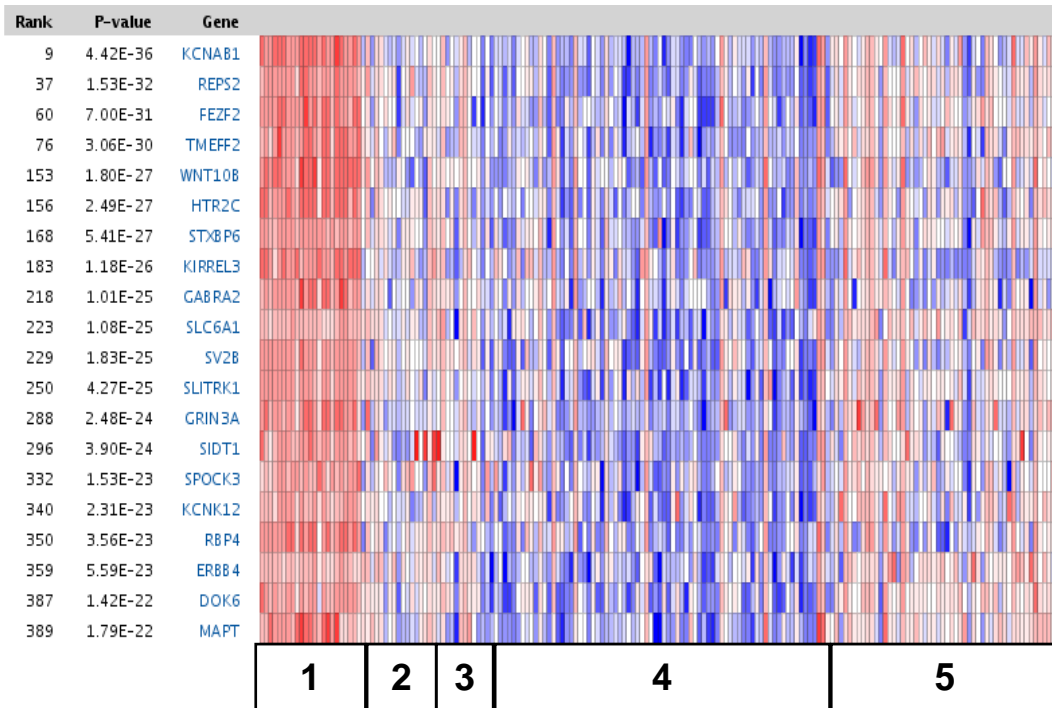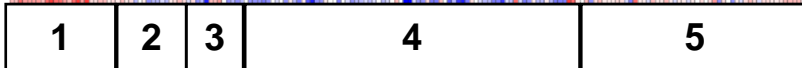

### Legend

- 1 Brain (23)
- 2 Anaplastic Astrocytoma (19)
- 3 Diffuse Astrocytoma (7)
- 4 Glioblastoma (81)
- 5 Oligodendroglioma (50)

- Least expressed
- Most expressed
- Undetermined

# B

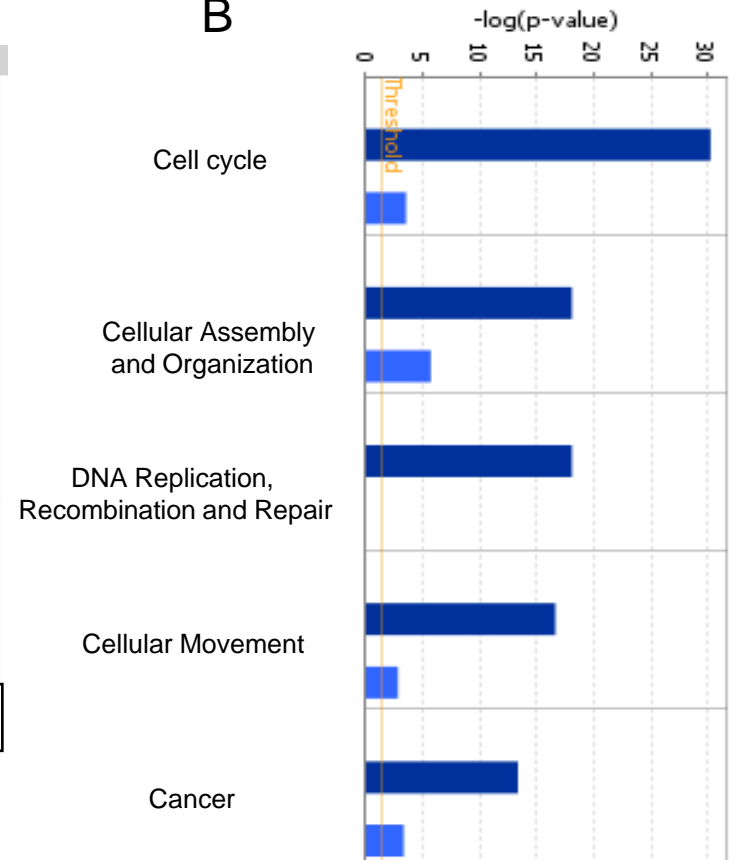

### Legend

- EZH2-associated genes
- PRC2 targets
